# Supplementary material
Source: Springer Nature journal article supplement (https://www.springermedizin.de/resource/supplementary/13756_2014_596_MOESM1_ESM.pdf/9683412)
Supplement: MOESM1 [file 9683412]

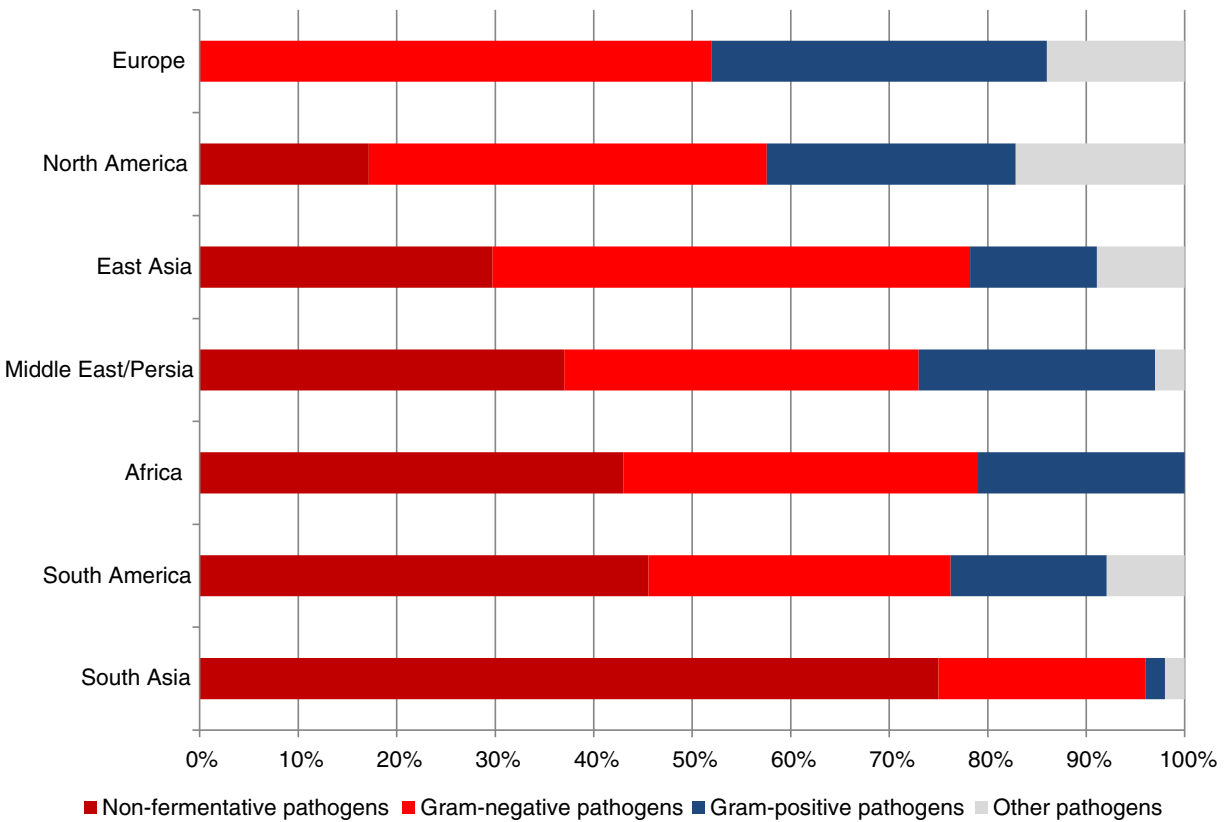

■ Non-fermentative pathogens ■ Gram-negative pathogens ■ Gram-positive pathogens ■ Other pathogens
